# Supplementary material for: Iron isotopic analysis of finger-prick and venous blood by multi-collector inductively coupled plasma-mass spectrometry after volumetric absorptive microsampling
Source: Royal Society of Chemistry journal article supplement (doi:10.1039/c6ja00394j), 2016-12-24
Supplement: c6ja00394j1.pdf [file c6ja00394j1.pdf]

## Supplementary Information

### Article:

### Iron isotopic analysis of finger-prick and venous blood by multi-collector inductively coupled plasma-mass spectrometry after volumetric absorptive microsampling

### Author list

Yulia Anoshkina, Marta Costas-Rodríguez and Frank Vanhaecke

### Tables

**Table S1. Iron concentrations of venous whole blood samples after extraction from VAMS tips and using the reference procedure.** Data are expressed in mg L<sup>-1</sup> as average of 2 sample replicates. The absolute deviation between the two values ranged between 7 and 10 mg L<sup>-1</sup>.

|                     | Venous whole blood sample |     |     |     |     | Seronorm whole blood L-1<br>reference material |
|---------------------|---------------------------|-----|-----|-----|-----|------------------------------------------------|
|                     | 1                         | 2   | 3   | 4   | 5   |                                                |
| Reference procedure | 411                       | 370 | 388 | 362 | 387 | 348                                            |
| VAMS                | 427                       | 360 | 376 | 361 | 374 | 350                                            |
